# Supplementary material for: Cholesterol Efflux Capacity Associates with the Ankle-Brachial Index but Not All-Cause Mortality in Patients with Peripheral Artery Disease
Source: MDPI journal article supplement (doi:10.3390/diagnostics11081407), 2021-08-04
Supplement: s1 [file s1]

## Supplementary data to Clemens et al., Cholesterol Efflux Capacity Associates with the Ankle-Brachial Index but Not All-Cause Mortality in Patients with Peripheral Artery Disease

**Supplemental Table S1:** Hazard ratios for mortality by cholesterol.

|                                        | HR Per 1-SD Increment [95%CI] | p-Value |
|----------------------------------------|-------------------------------|---------|
| Crude                                  | 0.817 [0.591-1.129]           | 0.220   |
| Corrected for gender                   | 0.799 [0.564-1.130]           | 0.204   |
| Corrected for age and gender           | 0.784 [0.563-1.091]           | 0.149   |
| Corrected for age, gender, and ABI     | 0.773 [0.546-1.093]           | 0.145   |
| Corrected for age, gender, and smoking | 0.790 [0.567-1.102]           | 0.165   |

Data are expressed as hazard ratios (HR) per 1 standard deviation (SD) increment and their respective 95% confidence intervals (CIs).

**Supplemental Table S2:** Hazard ratios for mortality by low-density lipoprotein cholesterol.

|                                        | HR Per 1-SD Increment [95%CI] | p-Value |
|----------------------------------------|-------------------------------|---------|
| Crude                                  | 0.847 [0.434-1.654]           | 0.628   |
| Corrected for gender                   | 0.766 [0.353-1.665]           | 0.766   |
| Corrected for age and gender           | 0.748 [0.359-1.560]           | 0.439   |
| Corrected for age, gender, and ABI     | 0.698 [0.307-1.588]           | 0.391   |
| Corrected for age, gender, and smoking | 0.746 [0.346-1.609]           | 0.454   |

Data are expressed as hazard ratios (HR) per 1 standard deviation (SD) increment and their respective 95% confidence intervals (CIs).

**Supplemental Table S3:** Hazard ratios for mortality by high-density lipoprotein cholesterol.

|                                        | HR Per 1-SD Increment [95%CI] | p-Value |
|----------------------------------------|-------------------------------|---------|
| Crude                                  | 0.778 [0.529-1.143]           | 0.201   |
| Corrected for gender                   | 0.804 [0.541-1.195]           | 0.280   |
| Corrected for age and gender           | 0.856 [0.560-1.307]           | 0.470   |
| Corrected for age, gender, and ABI     | 0.769 [0.491-1.209]           | 0.253   |
| Corrected for age, gender, and smoking | 0.914 [0.585-1.430]           | 0.695   |

Data are expressed as hazard ratios (HR) per 1 standard deviation (SD) increment and their respective 95% confidence intervals (CIs).

**Supplemental Table S4:** Hazard ratios for mortality by non-high-density lipoprotein cholesterol.

|                                        | HR Per 1-SD Increment [95%CI] | p-Value |
|----------------------------------------|-------------------------------|---------|
| Crude                                  | 0.879 [0.639-1.210]           | 0.429   |
| Corrected for gender                   | 0.852 [0.604-1.201]           | 0.360   |
| Corrected for age and gender           | 0.810 [0.583-1.125]           | 0.208   |
| Corrected for age, gender, and ABI     | 0.821 [0.584-1.155]           | 0.257   |
| Corrected for age, gender, and smoking | 0.798 [0.573-1.112]           | 0.183   |

Data are expressed as hazard ratios (HR) per 1 standard deviation (SD) increment and their respective 95% confidence intervals (CIs).

**Supplemental Table S5: Hazard ratios for mortality by triglycerides.**

|                                        | <b>HR Per 1-SD Increment [95%CI]</b> | <b>p-Value</b> |
|----------------------------------------|--------------------------------------|----------------|
| Crude                                  | 0.976 [0.675-1.411]                  | 0.897          |
| Corrected for gender                   | 0.989 [0.687-1.422]                  | 0.951          |
| Corrected for age and gender           | 1.185 [0.804-1.746]                  | 0.392          |
| Corrected for age, gender, and ABI     | 1.246 [0.843-1.842]                  | 0.271          |
| Corrected for age, gender, and smoking | 1.118 [0.741-1.688]                  | 0.595          |

Data are expressed as hazard ratios (HR) per 1 standard deviation (SD) increment and their respective 95% confidence intervals (CIs).

**Supplemental Table S6: Hazard ratios for mortality by apolipoprotein A-I.**

|                                        | <b>HR Per 1-SD Increment [95%CI]</b> | <b>p-Value</b> |
|----------------------------------------|--------------------------------------|----------------|
| Crude                                  | 0.754 [0.516-1.103]                  | 0.146          |
| Corrected for gender                   | 0.768 [0.524-1.127]                  | 0.178          |
| Corrected for age and gender           | 0.754 [0.505-1.125]                  | 0.167          |
| Corrected for age, gender, and ABI     | 0.707 [0.463-1.081]                  | 0.109          |
| Corrected for age, gender, and smoking | 0.769 [0.526-1.203]                  | 0.279          |

Data are expressed as hazard ratios (HR) per 1 standard deviation (SD) increment and their respective 95% confidence intervals (CIs).

**Supplemental Table S7: Hazard ratios for mortality by apolipoprotein B.**

|                                        | <b>HR Per 1-SD Increment [95%CI]</b> | <b>p-Value</b> |
|----------------------------------------|--------------------------------------|----------------|
| Crude                                  | 0.830 [0.584-1.182]                  | 0.302          |
| Corrected for gender                   | 0.843 [0.594-1.198]                  | 0.342          |
| Corrected for age and gender           | 0.758 [0.528-1.089]                  | 0.134          |
| Corrected for age, gender, and ABI     | 0.773 [0.534-1.121]                  | 0.175          |
| Corrected for age, gender, and smoking | 0.769 [0.539-1.098]                  | 0.149          |

Data are expressed as hazard ratios (HR) per 1 standard deviation (SD) increment and their respective 95% confidence intervals (CIs).

**Supplemental Table S8: Hazard ratios for mortality by lipoprotein(a).**

|                                        | <b>HR Per 1-SD Increment [95%CI]</b> | <b>p-Value</b> |
|----------------------------------------|--------------------------------------|----------------|
| Crude                                  | 1.166 [0.866-1.570]                  | 0.312          |
| Corrected for gender                   | 1.144 [0.851-1.538]                  | 0.374          |
| Corrected for age and gender           | 1.042 [0.753-1.441]                  | 0.805          |
| Corrected for age, gender, and ABI     | 1.030 [0.739-1.437]                  | 0.861          |
| Corrected for age, gender, and smoking | 1.028 [0.742-1.423]                  | 0.869          |

Data are expressed as hazard ratios (HR) per 1 standard deviation (SD) increment and their respective 95% confidence intervals (CIs).

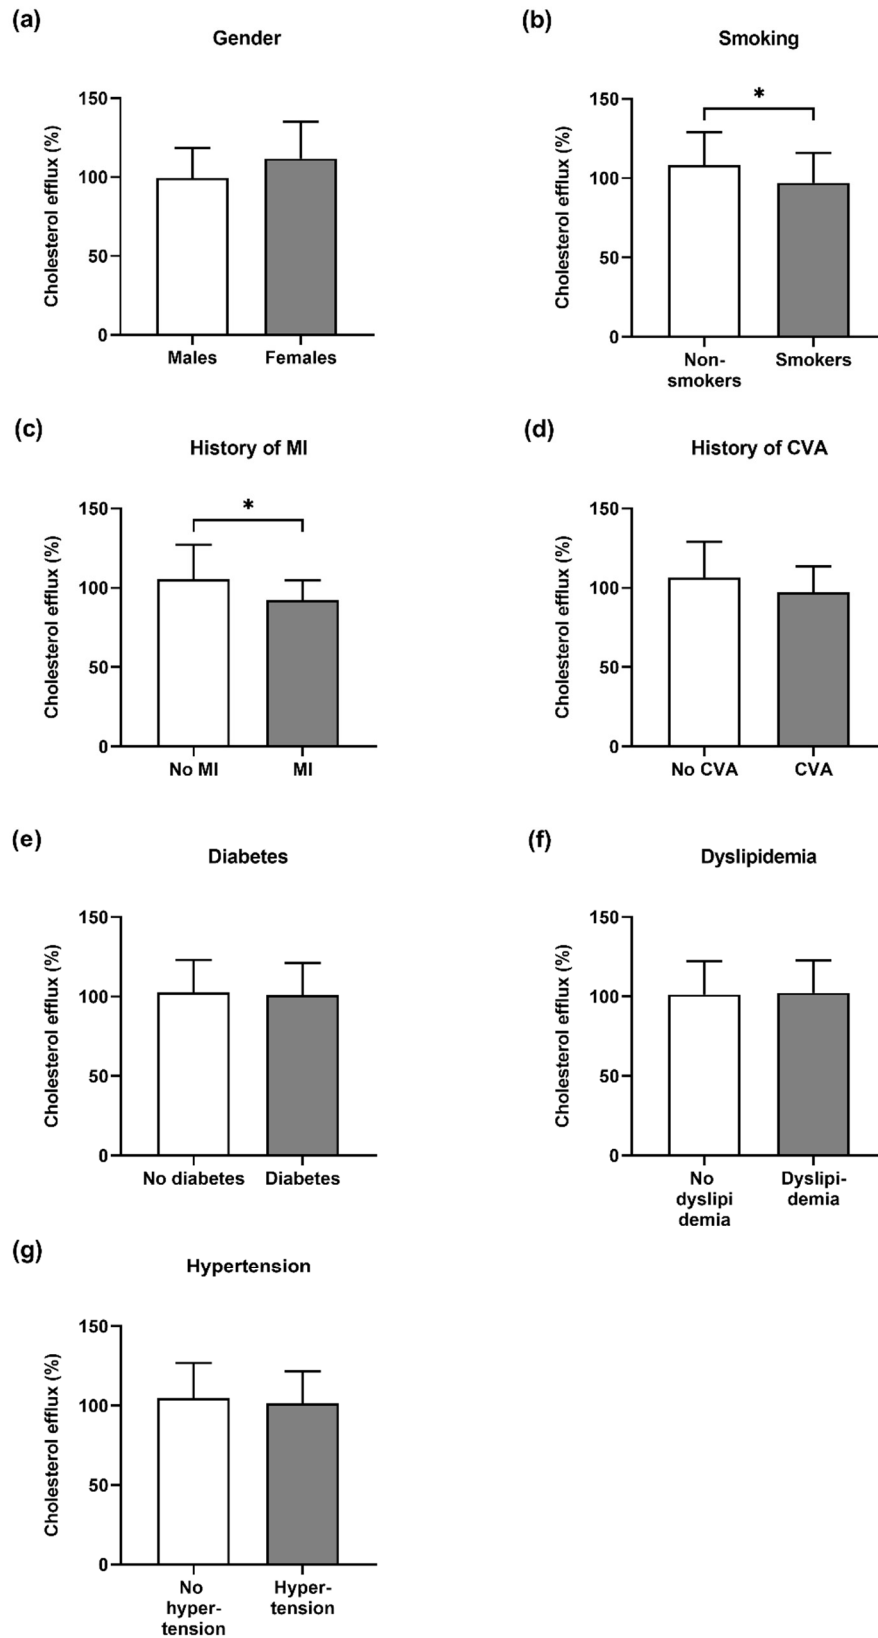

**Supplemental Figure S1.** CEC according to the clinical characteristics (a) gender, (b) smoking, (c) history of myocardial infarction (MI), (d) history of a cerebrovascular accident (CVA), (e) diabetes, (f) dyslipidemia, and (g) hypertension.
